# Supplementary material for: Possible Synergistic Effects of Thymol and Nicotine against Crithidia bombi Parasitism in Bumble Bees
Source: PubMed Central journal article supplement (PMC4686078; doi:10.1371/journal.pone.0144668), 2015-12-10

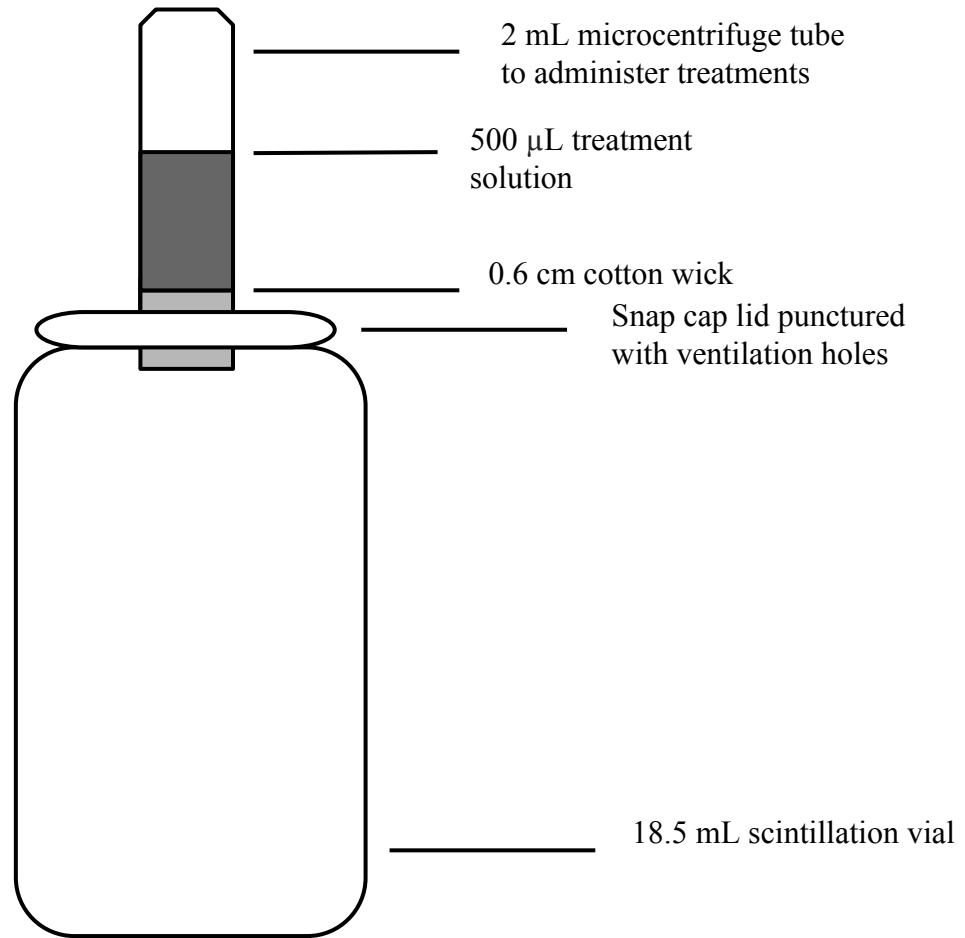

Supplement: pone.0144668.s001.pdf [file pone.0144668.s001.pdf]
